# Supplementary material
Source: PubMed Central journal article supplement (PMC6030480)
Supplement: NIHMS956033-supplement-1.pdf [file NIHMS956033-supplement-1.pdf]

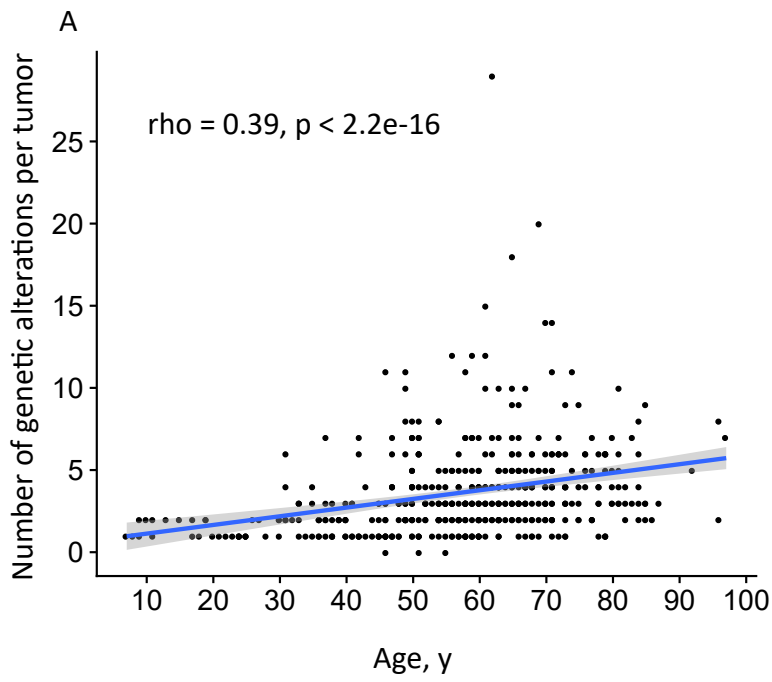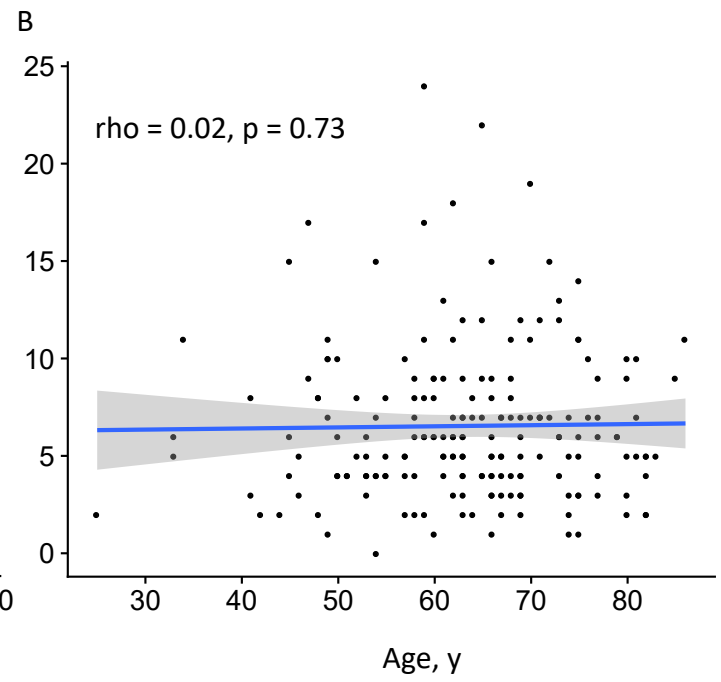

**Supplementary Figure 1. The number of genetic alterations per tumor increases with age in papillary (A) but not in anaplastic thyroid cancer (B). Linear regression line and 0.95 confidence interval are shown.**
