# Supplementary material
Source: PubMed Central journal article supplement (PMC6030480)
Supplement: NIHMS956033-supplement-4.pdf [file NIHMS956033-supplement-4.pdf]

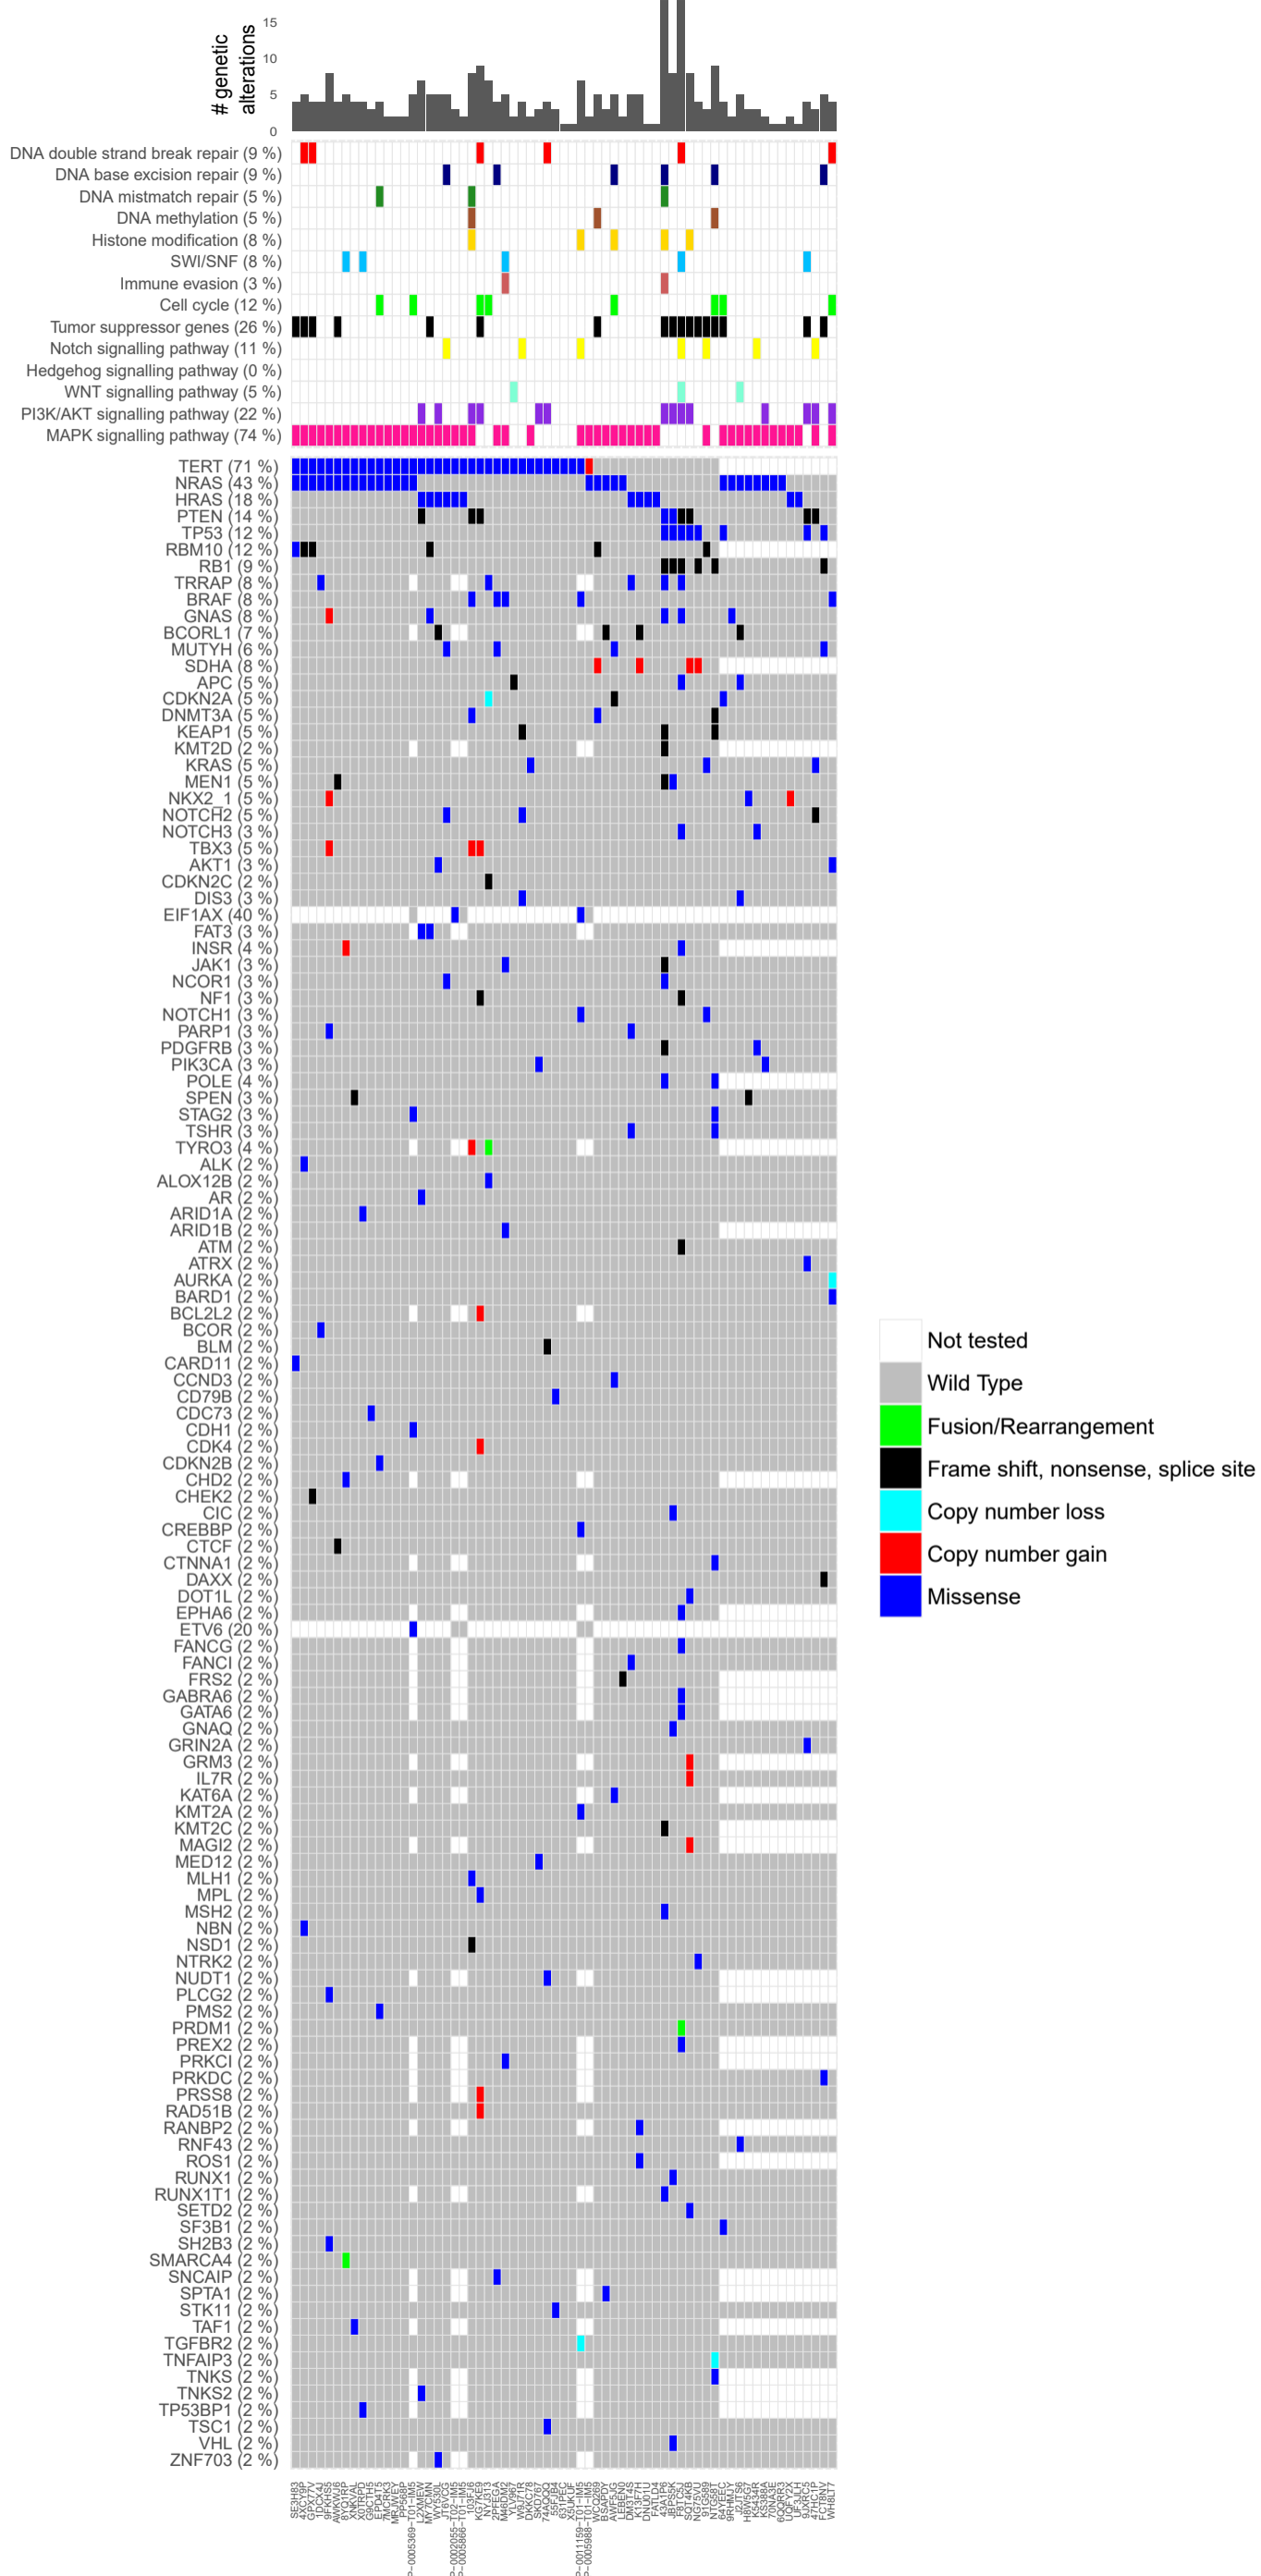

**Supplementary Figure 4. Genetic alterations in follicular thyroid cancer.**  
 Percentage of tumors with affected gene or pathway is shown in parentheses on the left.  
 Number of genetic alterations per tumor is shown on the top.
