# Supplementary material
Source: PubMed Central journal article supplement (PMC6030480)
Supplement: NIHMS956033-supplement-6.pdf [file NIHMS956033-supplement-6.pdf]

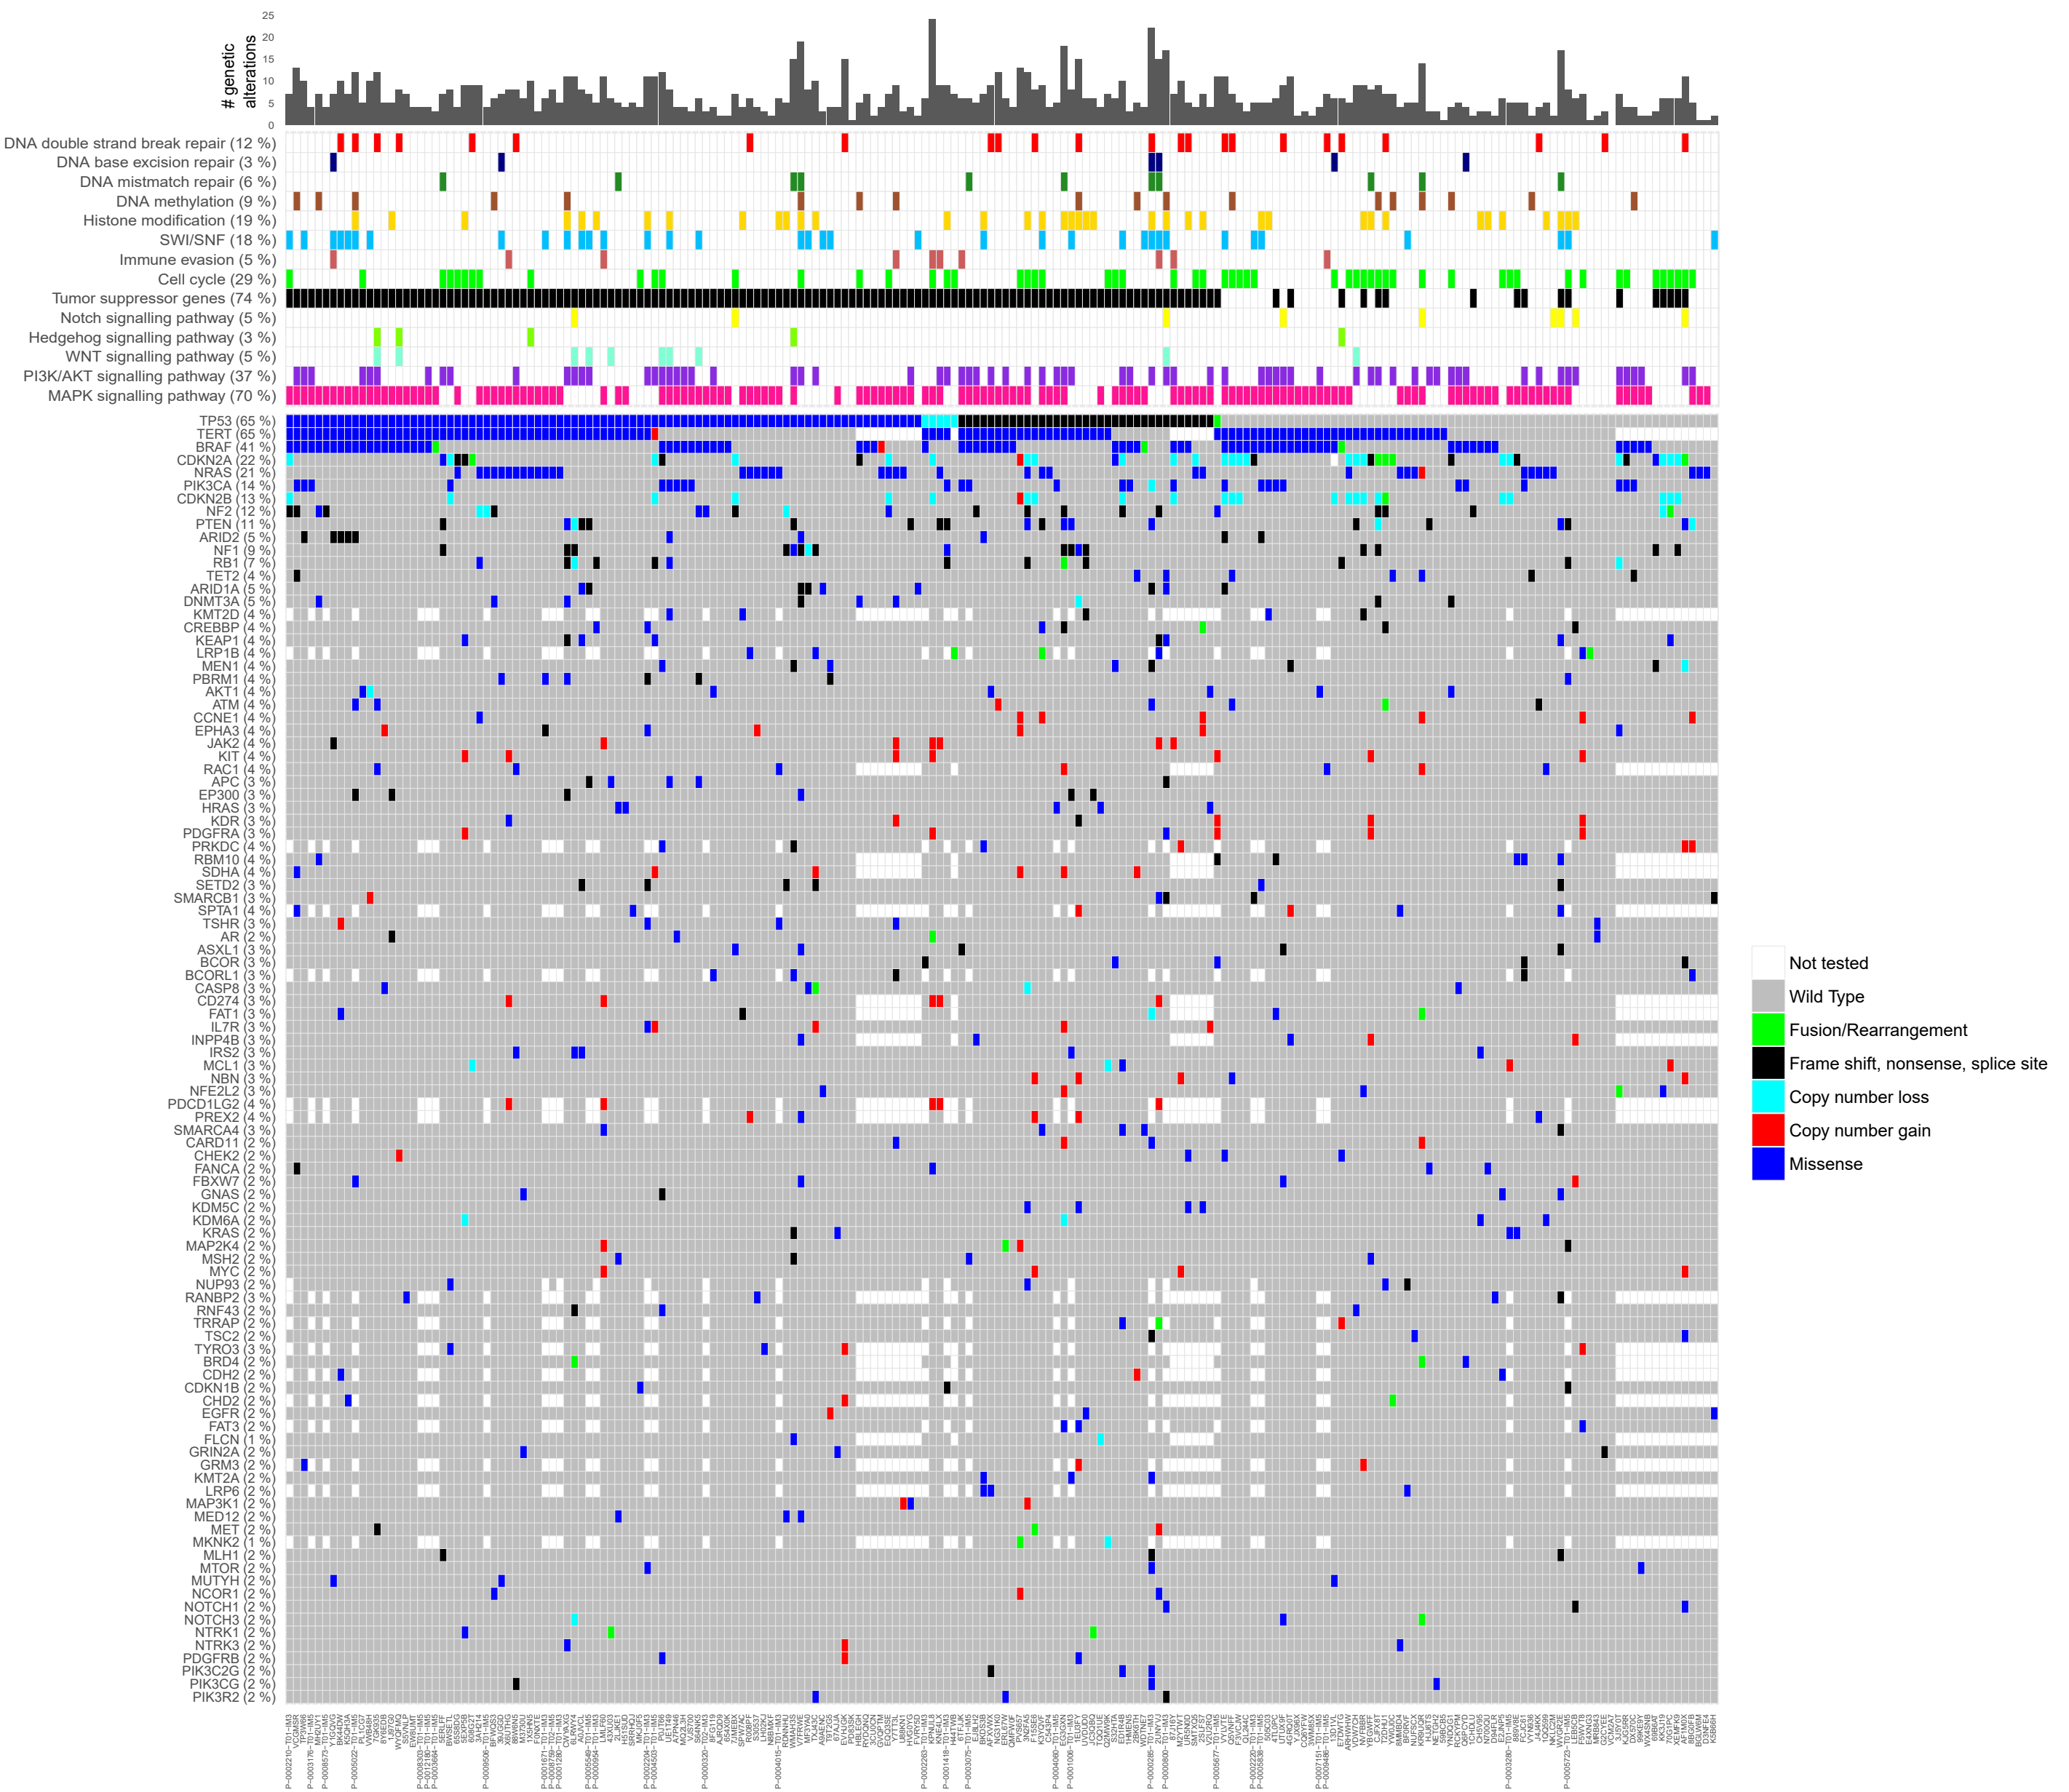

**Supplementary Figure 6. Genetic alterations in anaplastic thyroid cancer.**

Percentage of tumors with affected gene or pathway is shown in parentheses on the left.

Number of genetic alterations per tumor is shown on the top.
