# Supplementary material
Source: PubMed Central journal article supplement (PMC6030480)
Supplement: NIHMS956033-supplement-7.pdf [file NIHMS956033-supplement-7.pdf]

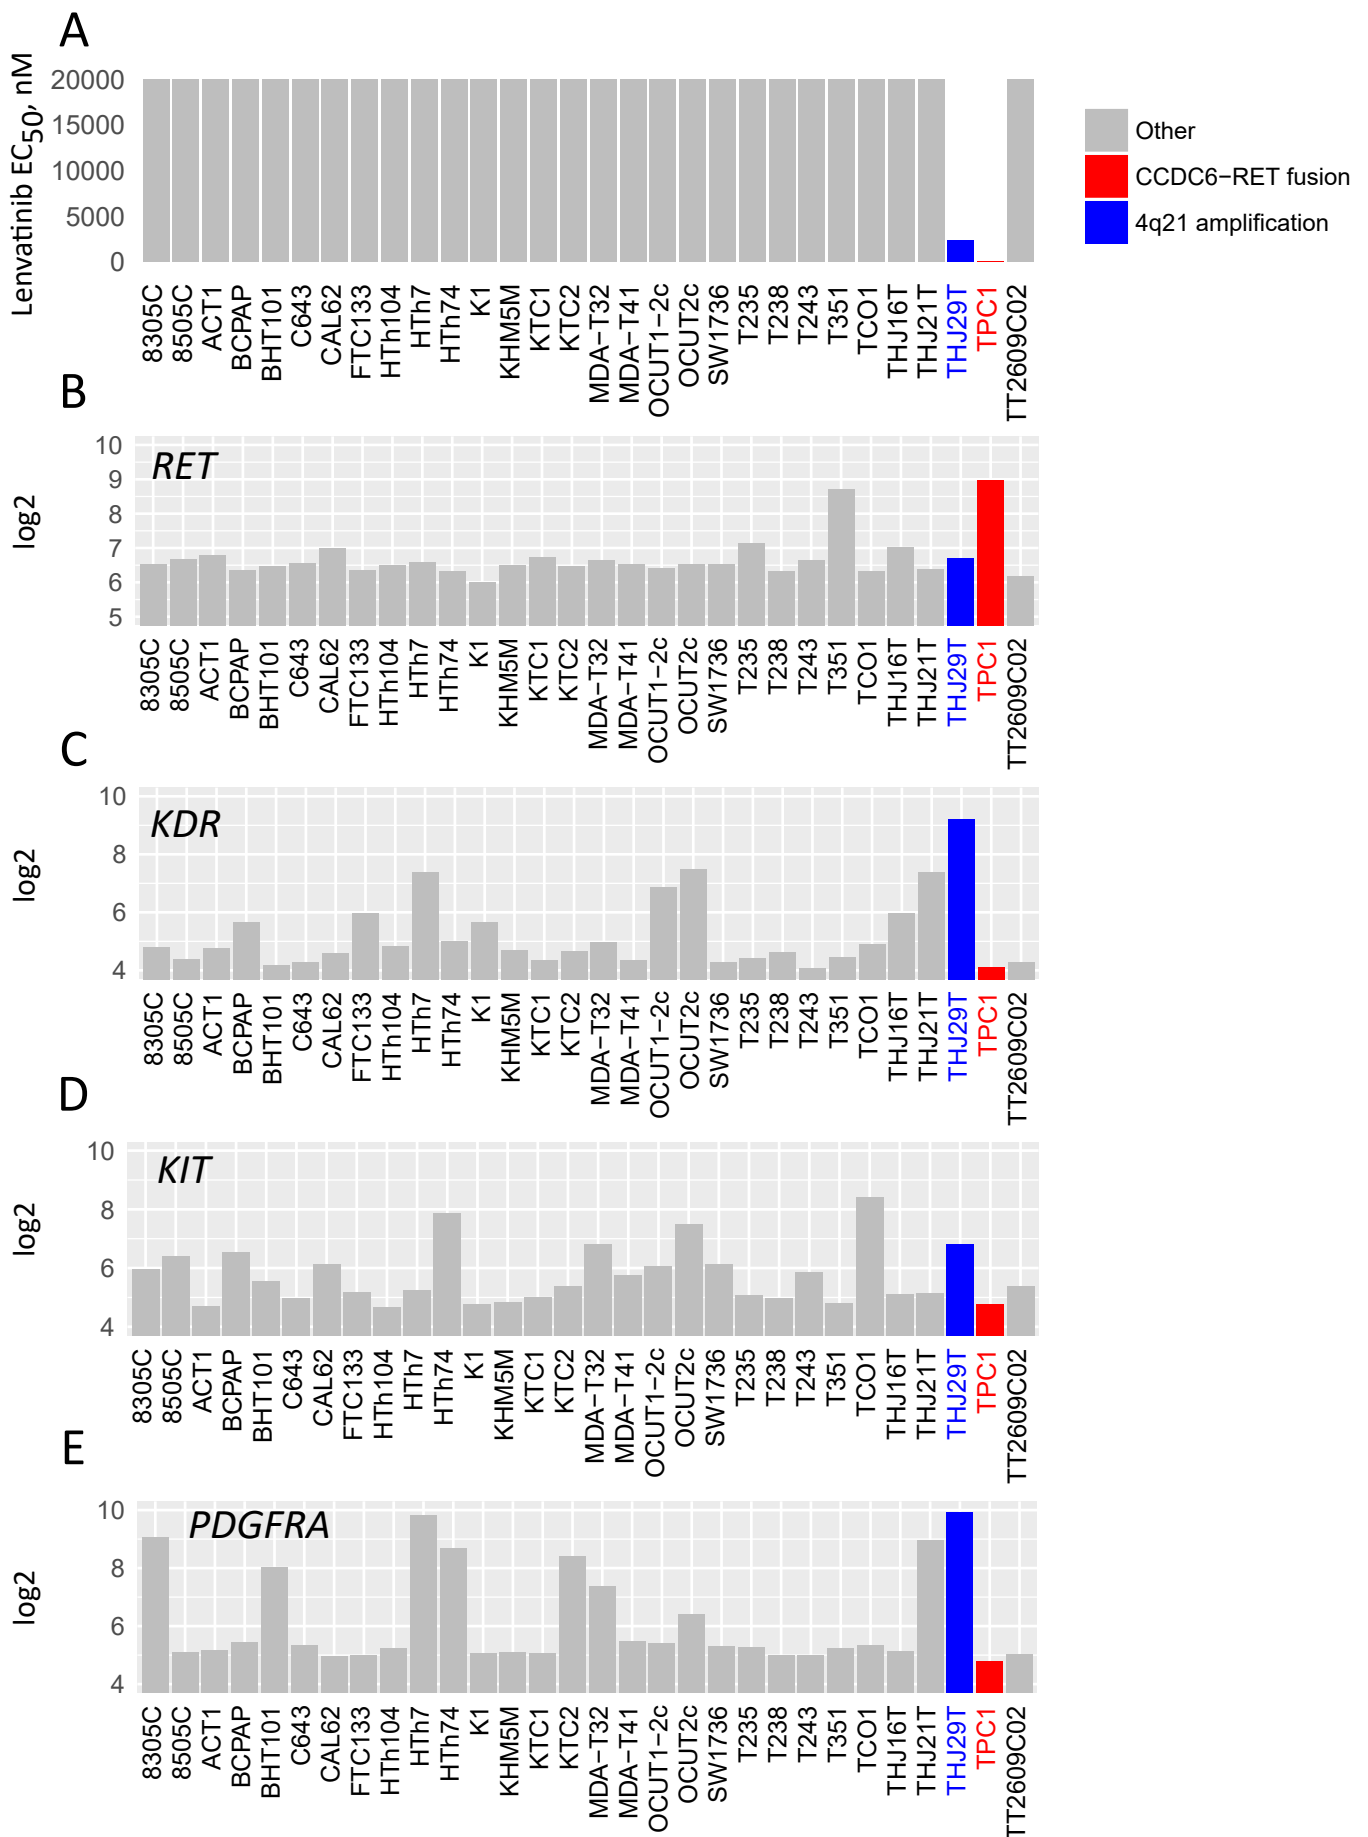

**Supplementary Figure 7. The sensitivity of thyroid cancer cell lines to lenvatinib *in vitro* (A) and the expression of *RET* (B), *KDR* (C), *KIT* (D) and *PDGFRA* (E). Gene expression is shown as log<sub>2</sub> transformed Affymetrix microarray signal. Lenvatinib-sensitive cell lines THJ29T and TPC1 and their genetic alterations are highlighted in color.**
